# Supplementary material
Source: MDPI journal article supplement (https://www.mdpi.com/2071-1050/14/17/10791)
Supplement: s1 [file s1]

**Table S1.** Populations of Lyle's flying fox (*Pteropus lylei*) at roosting sites in Thailand. All sequences were deposited in the DNA Data Bank of Japan (DDBJ).

| No. | Roosting site code | Province of roosting site    | Mitochondrial D-loop GenBank accession number | Cytochrome <i>b</i> GenBank accession number | Sex    |
|-----|--------------------|------------------------------|-----------------------------------------------|----------------------------------------------|--------|
| 1   | PL1_1              | Wat Khanontai, Ayutthaya     | LC579448                                      | LC580006                                     | female |
| 2   | PL1_2              | Wat Khanontai, Ayutthaya     | LC579449                                      | LC580007                                     | male   |
| 3   | PL1_3              | Wat Khanontai, Ayutthaya     | LC579450                                      | LC580008                                     | -      |
| 4   | PL1_4              | Wat Khanontai, Ayutthaya     | LC579451                                      | LC580009                                     | male   |
| 5   | PL1_5              | Wat Khanontai, Ayutthaya     | LC579452                                      | LC580010                                     | male   |
| 6   | PL1_6              | Wat Khanontai, Ayutthaya     | LC579453                                      | LC580011                                     | male   |
| 7   | PL1_7              | Wat Khanontai, Ayutthaya     | LC579454                                      | LC580012                                     | male   |
| 8   | PL1_8              | Wat Khanontai, Ayutthaya     | LC579455                                      | LC580013                                     | female |
| 9   | PL1_9              | Wat Khanontai, Ayutthaya     | LC579456                                      | LC580014                                     | male   |
| 10  | PL1_10             | Wat Khanontai, Ayutthaya     | LC579457                                      | LC580015                                     | male   |
| 11  | PL2_1              | Wat Thasung, Ayutthaya       | LC579458                                      | LC580016                                     | -      |
| 12  | PL2_2              | Wat Thasung, Ayutthaya       | LC579459                                      | LC580017                                     | male   |
| 13  | PL2_3              | Wat Thasung, Ayutthaya       | LC579460                                      | LC580018                                     | male   |
| 14  | PL2_4              | Wat Thasung, Ayutthaya       | LC579461                                      | LC580019                                     | male   |
| 15  | PL2_5              | Wat Thasung, Ayutthaya       | LC579462                                      | LC580020                                     | female |
| 16  | PL2_6              | Wat Thasung, Ayutthaya       | LC579463                                      | LC580021                                     | male   |
| 17  | PL2_7              | Wat Thasung, Ayutthaya       | LC579464                                      | LC580022                                     | male   |
| 18  | PL2_8              | Wat Thasung, Ayutthaya       | LC579465                                      | LC580023                                     | female |
| 19  | PL2_9              | Wat Thasung, Ayutthaya       | LC579466                                      | LC580024                                     | female |
| 20  | PL2_10             | Wat Thasung, Ayutthaya       | LC579467                                      | LC580025                                     | female |
| 21  | PL3_1              | Wat Chantraram, Angthong     | LC579468                                      | LC580026                                     | female |
| 22  | PL3_2              | Wat Chantraram, Angthong     | LC579469                                      | LC580027                                     | male   |
| 23  | PL3_3              | Wat Chantraram, Angthong     | LC579470                                      | LC580028                                     | female |
| 24  | PL3_4              | Wat Chantraram, Angthong     | LC579471                                      | LC580029                                     | male   |
| 25  | PL3_5              | Wat Chantraram, Angthong     | LC579472                                      | LC580030                                     | male   |
| 26  | PL3_6              | Wat Chantraram, Angthong     | LC579473                                      | LC580031                                     | female |
| 27  | PL3_7              | Wat Chantraram, Angthong     | LC579474                                      | LC580032                                     | female |
| 28  | PL3_8              | Wat Chantraram, Angthong     | LC579475                                      | LC580033                                     | male   |
| 29  | PL3_9              | Wat Chantraram, Angthong     | LC579476                                      | LC580034                                     | female |
| 30  | PL3_10             | Wat Chantraram, Angthong     | LC579477                                      | LC580035                                     | female |
| 31  | PL4_1              | Wat Tanen, Ayutthaya         | LC579478                                      | LC580036                                     | male   |
| 32  | PL4_2              | Wat Tanen, Ayutthaya         | LC579479                                      | LC580037                                     | female |
| 33  | PL4_3              | Wat Tanen, Ayutthaya         | LC579480                                      | LC580038                                     | male   |
| 34  | PL4_4              | Wat Tanen, Ayutthaya         | LC579481                                      | LC580039                                     | male   |
| 35  | PL4_5              | Wat Tanen, Ayutthaya         | LC579482                                      | LC580040                                     | -      |
| 36  | PL4_6              | Wat Tanen, Ayutthaya         | LC579483                                      | LC580041                                     | male   |
| 37  | PL4_7              | Wat Tanen, Ayutthaya         | LC579484                                      | LC580042                                     | -      |
| 38  | PL4_8              | Wat Tanen, Ayutthaya         | LC579485                                      | LC580043                                     | male   |
| 39  | PL4_9              | Wat Tanen, Ayutthaya         | LC579486                                      | LC580044                                     | male   |
| 40  | PL4_10             | Wat Tanen, Ayutthaya         | LC579487                                      | LC580045                                     | male   |
| 41  | PL5_1              | Wat Mongkoteeparam, Saraburi | LC579488                                      | LC580046                                     | male   |
| 42  | PL5_2              | Wat Mongkoteeparam, Saraburi | LC579489                                      | LC580047                                     | female |
| 43  | PL5_3              | Wat Mongkoteeparam, Saraburi | LC579490                                      | LC580048                                     | female |
| 44  | PL5_4              | Wat Mongkoteeparam, Saraburi | LC579491                                      | LC580049                                     | male   |

| No. | Roosting site code | Province of roosting site     | Mitochondrial D-loop GenBank accession number | Cytochrome <i>b</i> GenBank accession number | Sex    |
|-----|--------------------|-------------------------------|-----------------------------------------------|----------------------------------------------|--------|
| 45  | PL5_5              | Wat Mongkonteeparam, Saraburi | LC579492                                      | LC580050                                     | male   |
| 46  | PL5_6              | Wat Mongkonteeparam, Saraburi | LC579493                                      | LC580051                                     | male   |
| 47  | PL5_7              | Wat Mongkonteeparam, Saraburi | LC579494                                      | LC580052                                     | female |
| 48  | PL5_8              | Wat Mongkonteeparam, Saraburi | LC579495                                      | LC580053                                     | female |
| 49  | PL5_9              | Wat Mongkonteeparam, Saraburi | LC579496                                      | LC580054                                     | male   |
| 50  | PL5_10             | Wa Mongkonteeparam, Saraburi  | LC579497                                      | LC580055                                     | male   |
| 51  | PL6_1              | Wat Thewabut, Prachinburi     | LC579498                                      | LC580056                                     | female |
| 52  | PL6_2              | Wat Thewabut, Prachinburi     | LC579499                                      | LC580057                                     | male   |
| 53  | PL6_3              | Wat Thewabut, Prachinburi     | LC579500                                      | LC580058                                     | male   |
| 54  | PL6_4              | Wat Thewabut, Prachinburi     | LC579501                                      | LC580059                                     | male   |
| 55  | PL6_5              | Wat Thewabut, Prachinburi     | LC579502                                      | LC580060                                     | female |
| 56  | PL6_6              | Wat Thewabut, Prachinburi     | LC579503                                      | LC580061                                     | female |
| 57  | PL6_7              | Wat Thewabut, Prachinburi     | LC579504                                      | LC580062                                     | female |
| 58  | PL6_8              | Wat Thewabut, Prachinburi     | LC579505                                      | LC580063                                     | male   |
| 59  | PL6_9              | Wat Thewabut, Prachinburi     | LC579506                                      | LC580064                                     | female |
| 60  | PL6_10             | Wat Thewabut, Prachinburi     | LC579507                                      | LC580065                                     | female |
| 61  | PL7_1              | Wat Bangkrabao, Prachinburi   | LC579508                                      | LC580066                                     | female |
| 62  | PL7_2              | Wat Bangkrabao, Prachinburi   | LC579509                                      | LC580067                                     | female |
| 63  | PL7_3              | Wat Bangkrabao, Prachinburi   | LC579510                                      | LC580068                                     | male   |
| 64  | PL7_4              | Wat Bangkrabao, Prachinburi   | LC579511                                      | LC580069                                     | female |
| 65  | PL7_5              | Wat Bangkrabao, Prachinburi   | LC579512                                      | LC580070                                     | male   |
| 66  | PL7_7              | Wat Bangkrabao, Prachinburi   | LC579513                                      | LC580071                                     | male   |
| 67  | PL7_8              | Wat Bangkrabao, Prachinburi   | LC579514                                      | LC580072                                     | male   |
| 68  | PL7_9              | Wat Bangkrabao, Prachinburi   | LC579515                                      | LC580073                                     | male   |
| 69  | PL7_10             | Wat Bangkrabao, Prachinburi   | LC579516                                      | LC580074                                     | female |
| 70  | PL8_1              | Education Center, Chonburi    | LC579517                                      | LC580075                                     | female |
| 71  | PL8_2              | Education Center, Chonburi    | LC579518                                      | LC580076                                     | male   |
| 72  | PL8_3              | Education Center, Chonburi    | LC579519                                      | LC580077                                     | male   |
| 73  | PL8_4              | Education Center, Chonburi    | LC579520                                      | LC580078                                     | female |
| 74  | PL8_5              | Education Center, Chonburi    | LC579521                                      | LC580079                                     | male   |
| 75  | PL8_6              | Education Center, Chonburi    | LC579522                                      | LC580080                                     | female |
| 76  | PL8_7              | Education Center, Chonburi    | LC579523                                      | LC580081                                     | female |
| 77  | PL8_8              | Education Center, Chonburi    | LC579524                                      | LC580082                                     | male   |
| 78  | PL8_9              | Education Center, Chonburi    | LC579525                                      | LC580083                                     | female |
| 79  | PL8_10             | Education Center, Chonburi    | LC579526                                      | LC580084                                     | female |
| 80  | PL9_2              | Wat Luangphrommawat, Chonburi | LC579527                                      | LC580085                                     | female |
| 81  | PL9_3              | Wat Luangphrommawat, Chonburi | LC579528                                      | LC580086                                     | female |
| 82  | PL9_4              | Wat Luangphrommawat, Chonburi | LC579529                                      | LC580087                                     | female |
| 83  | PL9_5              | Wat Luangphrommawat, Chonburi | LC579530                                      | LC580088                                     | female |
| 84  | PL9_7              | Wat Luangphrommawat, Chonburi | LC579531                                      | LC580089                                     | male   |

| No. | Roosting site code | Province of roosting site     | Mitochondrial D-loop GenBank accession number | Cytochrome <i>b</i> GenBank accession number | Sex    |
|-----|--------------------|-------------------------------|-----------------------------------------------|----------------------------------------------|--------|
| 85  | PL9_8              | Wat Luangphrommawat, Chonburi | LC579532                                      | LC580090                                     | male   |
| 86  | PL9_9              | Wat Luangphrommawat, Chonburi | LC579533                                      | LC580091                                     | male   |
| 87  | PL9_10             | Wat Luangphrommawat, Chonburi | LC579534                                      | LC580092                                     | female |
| 88  | PL10_1             | Wat Phobangkla, Chachoengsao  | LC579535                                      | LC580093                                     | male   |
| 89  | PL10_2             | Wat Phobangkla, Chachoengsao  | LC579536                                      | LC580094                                     | male   |
| 90  | PL10_3             | Wat Phobangkla, Chachoengsao  | LC579537                                      | LC580095                                     | female |
| 91  | PL10_4             | Wat Phobangkla, Chachoengsao  | LC579538                                      | LC580096                                     | male   |
| 92  | PL10_5             | Wat Phobangkla, Chachoengsao  | LC579539                                      | LC580097                                     | male   |
| 93  | PL10_6             | Wat Phobangkla, Chachoengsao  | LC579540                                      | LC580098                                     | female |
| 94  | PL10_7             | Wat Phobangkla, Chachoengsao  | LC579541                                      | LC580099                                     | male   |

**Table S2.** Genetic differentiation between the ten colonies of Lyle's flying fox (*Pteropus lylei*) for the D-loop sequence. Genetic differentiation coefficient ( $G_{ST}$ ), Wright's  $F$ -statistics for subpopulations within the total population ( $F_{ST}$ ),  $\Phi_{ST}$ , gene flow ( $N_m$ ) from sequence data and haplotype data, average number of nucleotide substitutions per site between populations ( $D_{xy}$ ), net nucleotide substitutions per site between populations ( $D_a$ ), and Mantel test results.

| Colony 1 | Colony 2 | $G_{ST}$ | $\Phi_{ST}$ | $F_{ST}$ | $D_{xy}$ | $D_a$  | $N_m$      | Presence of IBD <sup>1</sup> |
|----------|----------|----------|-------------|----------|----------|--------|------------|------------------------------|
| AY1      | AY2      | -0.038   | 0.022       | -0.076   | 0.008    | -0.001 | $\infty^2$ | NO                           |
| AY1      | AT1      | -0.045   | 0.018       | -0.087   | 0.007    | -0.001 | $\infty$   | NO                           |
| AY1      | AY3      | -0.010   | 0.053       | -0.036   | 0.012    | 0.000  | $\infty$   | NO                           |
| AY1      | SB1      | -0.024   | 0.033       | -0.043   | 0.009    | 0.000  | $\infty$   | NO                           |
| AY1      | PBR1     | 0.004    | 0.067       | 0.000    | 0.007    | 0.000  | $\infty$   | NO                           |
| AY1      | PBR2     | -0.025   | 0.042       | -0.032   | 0.011    | 0.000  | $\infty$   | NO                           |
| AY1      | CH1      | -0.036   | 0.028       | -0.045   | 0.010    | -0.001 | $\infty$   | NO                           |
| AY1      | CH2      | -0.021   | 0.038       | -0.032   | 0.013    | -0.001 | $\infty$   | NO                           |
| AY1      | CHS2     | -0.034   | 0.043       | -0.062   | 0.010    | -0.001 | $\infty$   | NO                           |
| AY2      | AT1      | -0.031   | 0.054       | -0.026   | 0.009    | 0.000  | $\infty$   | NO                           |
| AY2      | AY3      | -0.020   | 0.071       | -0.004   | 0.014    | 0.000  | $\infty$   | NO                           |
| AY2      | SB1      | -0.026   | 0.038       | -0.030   | 0.011    | 0.000  | $\infty$   | NO                           |
| AY2      | PBR1     | -0.007   | 0.034       | -0.038   | 0.008    | 0.000  | $\infty$   | NO                           |
| AY2      | PBR2     | -0.030   | 0.047       | -0.062   | 0.012    | 0.000  | $\infty$   | NO                           |
| AY2      | CH1      | -0.023   | 0.044       | -0.014   | 0.011    | 0.000  | 415.000    | NO                           |
| AY2      | CH2      | -0.030   | 0.049       | 0.001    | 0.015    | 0.000  | $\infty$   | NO                           |
| AY2      | CHS2     | -0.030   | 0.044       | -0.026   | 0.011    | -0.001 | $\infty$   | NO                           |
| AT1      | AY3      | -0.025   | 0.029       | -0.039   | 0.012    | -0.001 | $\infty$   | NO                           |
| AT1      | SB1      | -0.025   | 0.052       | -0.065   | 0.011    | 0.000  | $\infty$   | NO                           |
| AT1      | PBR1     | 0.031    | 0.117       | -0.017   | 0.009    | 0.001  | 6.250      | NO                           |
| AT1      | PBR2     | -0.024   | 0.047       | -0.074   | 0.012    | 0.000  | $\infty$   | NO                           |
| AT1      | CH1      | -0.037   | 0.034       | -0.039   | 0.011    | 0.000  | $\infty$   | NO                           |
| AT1      | CH2      | -0.018   | 0.043       | -0.043   | 0.014    | -0.001 | $\infty$   | NO                           |
| AT1      | CHS2     | -0.028   | 0.049       | -0.007   | 0.011    | 0.000  | $\infty$   | NO                           |
| AY3      | SB1      | -0.014   | 0.068       | 0.001    | 0.015    | 0.000  | 337        | NO                           |
| AY3      | PBR1     | 0.033    | 0.114       | 0.072    | 0.013    | 0.002  | 6.432      | NO                           |
| AY3      | PBR2     | -0.037   | 0.026       | -0.078   | 0.015    | -0.001 | $\infty$   | NO                           |
| AY3      | CH1      | -0.009   | 0.040       | -0.050   | 0.015    | 0.000  | $\infty$   | NO                           |
| AY3      | CH2      | -0.021   | 0.037       | -0.038   | 0.018    | -0.001 | $\infty$   | NO                           |
| AY3      | CHS2     | -0.027   | 0.023       | -0.106   | 0.014    | -0.001 | $\infty$   | NO                           |
| SB1      | PBR1     | 0.027    | 0.072       | 0.004    | 0.010    | 0.000  | 103.750    | NO                           |
| SB1      | PBR2     | -0.022   | 0.047       | -0.019   | 0.013    | 0.000  | $\infty$   | NO                           |
| SB1      | CH1      | -0.016   | 0.043       | -0.008   | 0.013    | 0.000  | $\infty$   | NO                           |
| SB1      | CH2      | -0.036   | 0.036       | -0.047   | 0.016    | -0.001 | $\infty$   | NO                           |
| SB1      | CHS2     | -0.018   | 0.048       | -0.036   | 0.013    | 0.000  | $\infty$   | NO                           |
| PBR1     | PBR2     | 0.022    | 0.091       | 0.069*   | 0.011    | 0.001  | 6.649      | NO                           |
| PBR1     | CH1      | 0.052    | 0.093       | 0.090    | 0.011    | 0.001  | 5.000      | NO                           |
| PBR1     | CH2      | 0.000    | 0.082       | 0.018    | 0.014    | 0.000  | 26.763     | NO                           |
| PBR1     | CHS2     | 0.020    | 0.082       | 0.034    | 0.010    | 0.000  | 13.989     | NO                           |
| PBR2     | CH1      | -0.025   | 0.022       | -0.089   | 0.013    | -0.001 | $\infty$   | NO                           |
| PBR2     | CH2      | -0.028   | 0.024       | -0.066   | 0.016    | -0.001 | $\infty$   | NO                           |
| PBR2     | CHS2     | -0.047   | 0.011       | -0.129   | 0.013    | -0.002 | $\infty$   | NO                           |
| CH1      | CH2      | -0.007   | 0.011       | -0.067   | 0.015    | -0.002 | $\infty$   | NO                           |
| CH1      | CHS2     | -0.041   | 0.020       | -0.105   | 0.012    | -0.001 | $\infty$   | NO                           |
| CH2      | CHS2     | -0.007   | 0.027       | -0.084   | 0.016    | -0.001 | $\infty$   | NO                           |

Significant differentiation values \* $p < 0.05$

<sup>1</sup> Presence of IBD = NO represents/indicates a non-significant correlation between genetic distance and geographic distance.

<sup>2</sup>  $\infty$  = Presence of high gene flow.

**Table S3.** Genetic differentiation between the ten colonies of Lyle's flying fox (*Pteropus lylei*) for the Cytochrome *b* sequence. Genetic differentiation coefficient ( $G_{ST}$ ), Wright's  $F$ -statistics for subpopulations within the total population ( $F_{ST}$ ),  $\Phi_{ST}$ , gene flow ( $N_m$ ) from sequence data and haplotype data, average number of nucleotide substitutions per site between populations ( $D_{xy}$ ), net nucleotide substitutions per site between populations ( $D_a$ ), and Mantel test results.

| Colony 1 | Colony 2 | $G_{ST}$ | $\Phi_{ST}$ | $F_{ST}$ | $D_{xy}$ | $D_a$  | $N_m$      | Presence of IBD <sup>1</sup> |
|----------|----------|----------|-------------|----------|----------|--------|------------|------------------------------|
| AY1      | AY2      | -0.003   | 0.065       | 0.024    | 0.007    | 0.000  | 18.023     | NO                           |
| AY1      | AT1      | -0.015   | 0.013       | -0.084   | 0.007    | -0.001 | $\infty^2$ | NO                           |
| AY1      | AY3      | -0.014   | 0.035       | -0.035   | 0.006    | 0.000  | $\infty$   | NO                           |
| AY1      | SB1      | 0.005    | 0.111       | 0.112    | 0.007    | 0.001  | 3.877      | NO                           |
| AY1      | PBR1     | 0.021    | 0.119       | 0.125    | 0.008    | 0.001  | 3.437      | NO                           |
| AY1      | PBR2     | -0.019   | 0.024       | -0.066   | 0.006    | 0.000  | $\infty$   | NO                           |
| AY1      | CH1      | 0.001    | 0.025       | -0.058   | 0.007    | 0.000  | $\infty$   | NO                           |
| AY1      | CH2      | -0.025   | 0.015       | -0.093   | 0.006    | -0.001 | $\infty$   | NO                           |
| AY1      | CHS2     | 0.012    | 0.030       | -0.073   | 0.007    | -0.001 | $\infty$   | NO                           |
| AY2      | AT1      | 0.007    | 0.067       | 0.028    | 0.008    | 0.000  | 14.688     | NO                           |
| AY2      | AY3      | 0.034    | 0.149       | 0.177*   | 0.008    | 0.001  | 2.364      | NO                           |
| AY2      | SB1      | 0.001    | 0.028       | -0.051   | 0.007    | 0.000  | $\infty$   | NO                           |
| AY2      | PBR1     | 0.017    | 0.030       | -0.045   | 0.007    | 0.000  | $\infty$   | NO                           |
| AY2      | PBR2     | 0.011    | 0.056       | 0.002    | 0.007    | 0.000  | 278.000    | NO                           |
| AY2      | CH1      | 0.013    | 0.069       | 0.032    | 0.008    | 0.000  | 18.468     | NO                           |
| AY2      | CH2      | 0.039    | 0.075       | 0.033    | 0.008    | 0.000  | 14.340     | NO                           |
| AY2      | CHS2     | -0.013   | 0.057       | -0.013   | 0.008    | 0.000  | $\infty$   | NO                           |
| AT1      | AY3      | 0.002    | 0.041       | -0.024   | 0.006    | 0.000  | $\infty$   | NO                           |
| AT1      | SB1      | 0.020    | 0.108       | 0.106    | 0.008    | 0.001  | 3.815      | NO                           |
| AT1      | PBR1     | 0.004    | 0.111       | 0.112    | 0.008    | 0.001  | 3.622      | NO                           |
| AT1      | PBR2     | -0.007   | 0.028       | -0.057   | 0.007    | 0.000  | $\infty$   | NO                           |
| AT1      | CH1      | -0.005   | 0.029       | -0.048   | 0.007    | 0.000  | $\infty$   | NO                           |
| AT1      | CH2      | 0.003    | 0.024       | -0.073   | 0.007    | 0.000  | $\infty$   | NO                           |
| AT1      | CHS2     | -0.015   | 0.031       | -0.070   | 0.007    | -0.001 | $\infty$   | NO                           |
| AY3      | SB1      | 0.033    | 0.211       | 0.276*   | 0.008    | 0.002  | 1.371      | NO                           |
| AY3      | PBR1     | 0.054    | 0.216       | 0.283*   | 0.008    | 0.002  | 1.287      | NO                           |
| AY3      | PBR2     | -0.007   | 0.054       | -0.005   | 0.006    | 0.000  | $\infty$   | NO                           |
| AY3      | CH1      | 0.013    | 0.043       | -0.021   | 0.007    | 0.000  | $\infty$   | NO                           |
| AY3      | CH2      | -0.027   | 0.028       | -0.069   | 0.006    | 0.000  | $\infty$   | NO                           |
| AY3      | CHS2     | 0.030    | 0.049       | -0.038   | 0.006    | 0.000  | $\infty$   | NO                           |
| SB1      | PBR1     | 0.009    | 0.035       | -0.037   | 0.006    | 0.000  | $\infty$   | NO                           |
| SB1      | PBR2     | -0.008   | 0.083       | 0.054    | 0.007    | 0.000  | 8.827      | NO                           |
| SB1      | CH1      | 0.047    | 0.107       | 0.104    | 0.008    | 0.001  | 4.587      | NO                           |
| SB1      | CH2      | 0.038    | 0.114       | 0.105    | 0.007    | 0.001  | 4.219      | NO                           |
| SB1      | CHS2     | 0.033    | 0.110       | 0.087    | 0.008    | 0.001  | 4.717      | NO                           |
| PBR1     | PBR2     | 0.017    | 0.102       | 0.088    | 0.007    | 0.001  | 5.112      | NO                           |
| PBR1     | CH1      | 0.047    | 0.130       | 0.144    | 0.009    | 0.001  | 3.224      | NO                           |
| PBR1     | CH2      | 0.045    | 0.127       | 0.129    | 0.008    | 0.001  | 3.375      | NO                           |
| PBR1     | CHS2     | 0.003    | 0.099       | 0.067    | 0.008    | 0.001  | 6.262      | NO                           |
| PBR2     | CH1      | 0.016    | 0.023       | -0.066   | 0.007    | 0.000  | $\infty$   | NO                           |
| PBR2     | CH2      | -0.016   | 0.013       | -0.106   | 0.006    | -0.001 | $\infty$   | NO                           |
| PBR2     | CHS2     | 0.010    | 0.023       | -0.095*  | 0.007    | -0.001 | $\infty$   | NO                           |
| CH1      | CH2      | 0.015    | 0.014       | -0.093   | 0.007    | -0.001 | $\infty$   | NO                           |
| CH1      | CHS2     | -0.009   | 0.027       | -0.077   | 0.008    | -0.001 | $\infty$   | NO                           |
| CH2      | CHS2     | 0.031    | 0.023       | -0.104   | 0.007    | -0.001 | $\infty$   | NO                           |

Significant differentiation values \* $p < 0.05$

<sup>1</sup> Presence of IBD = NO represents/indicates a non-significant correlation between genetic distance and geographic distance.

<sup>2</sup>  $\infty$  = Presence of high gene flow.

**Table S4.** Bayesian estimates of mutation-scaled effective population sizes ( $\Theta$ ) and asymmetric migration rates (M) among *Pteropus lylei* for the mt D-loop and *Cytb* sequence. Credibility intervals are reported at 95% for each derived migration rate parameter  $N_{em}$ , reflecting the effective number of migrants per generation.

| Parameter          | 2.5%  | 25%   | Mode  | 75%   | 97.5% |
|--------------------|-------|-------|-------|-------|-------|
| $\Theta_1^1$       | 0.022 | 0.040 | 0.047 | 0.049 | 0.051 |
| $\Theta_2^2$       | 0.000 | 0.000 | 0.001 | 0.002 | 0.002 |
| $\Theta_3^3$       | 0.005 | 0.009 | 0.011 | 0.014 | 0.031 |
| $\Theta_4^4$       | 0.011 | 0.034 | 0.045 | 0.048 | 0.049 |
| $\Theta_5^5$       | 0.000 | 0.000 | 0.002 | 0.003 | 0.008 |
| $\Theta_6^6$       | 0.000 | 0.000 | 0.003 | 0.005 | 0.011 |
| $\Theta_7^7$       | 0.000 | 0.000 | 0.002 | 0.004 | 0.005 |
| $\Theta_8^8$       | 0.019 | 0.033 | 0.042 | 0.045 | 0.049 |
| $\Theta_9^9$       | 0.000 | 0.000 | 0.002 | 0.005 | 0.005 |
| $\Theta_{10}^{10}$ | 0.001 | 0.002 | 0.003 | 0.005 | 0.021 |
| $M_{1>2}$          | 0.0   | 72    | 116.3 | 180   | 332   |
| $M_{1>3}$          | 18.7  | 80.7  | 106.3 | 180   | 309.3 |
| $M_{1>4}$          | 0.0   | 46.7  | 84.3  | 106.7 | 329.3 |
| $M_{1>5}$          | 152.7 | 228.7 | 300.3 | 339.3 | 492   |
| $M_{1>6}$          | 184   | 346   | 458.3 | 481.3 | 488.7 |
| $M_{1>7}$          | 0.0   | 24    | 57    | 124.7 | 298.7 |
| $M_{1>8}$          | 220   | 416   | 478.3 | 496.7 | 506.7 |
| $M_{1>9}$          | 14    | 57.3  | 144.3 | 197.3 | 400   |
| $M_{1>10}$         | 76    | 100.7 | 187   | 274.7 | 488.7 |
| $M_{2>1}$          | 194   | 309.3 | 379.7 | 470.7 | 492.7 |
| $M_{2>3}$          | 0.0   | 13.3  | 36.3  | 90.7  | 236   |
| $M_{2>4}$          | 202.7 | 321.3 | 411   | 492   | 504   |
| $M_{2>5}$          | 265.3 | 359.3 | 479   | 493.3 | 503.3 |
| $M_{2>6}$          | 0.0   | 0.0   | 10.3  | 56    | 144   |
| $M_{2>7}$          | 0.0   | 0.0   | 0.3   | 60    | 165.3 |
| $M_{2>8}$          | 0.0   | 265.3 | 361   | 407.3 | 510.7 |
| $M_{2>9}$          | 38.7  | 159.3 | 239   | 321.3 | 426   |
| $M_{2>10}$         | 152   | 380   | 415.7 | 480   | 498.7 |
| $M_{3>1}$          | 216   | 345.3 | 368.3 | 409.3 | 504   |
| $M_{3>2}$          | 70    | 126.7 | 170.3 | 232.7 | 421.3 |
| $M_{3>4}$          | 20    | 26    | 59.7  | 162.7 | 178   |
| $M_{3>5}$          | 82.7  | 328.7 | 476.3 | 496.7 | 498.7 |
| $M_{3>6}$          | 229.3 | 402   | 431   | 484.7 | 501.3 |
| $M_{3>7}$          | 264   | 361.3 | 438.3 | 484   | 497.3 |
| $M_{3>8}$          | 142   | 279.3 | 316.3 | 377.3 | 491.3 |
| $M_{3>9}$          | 168.7 | 281.3 | 364.3 | 421.3 | 491.3 |
| $M_{3>10}$         | 0.0   | 0.0   | 22.3  | 84    | 389.3 |
| $M_{4>1}$          | 0.0   | 8.7   | 79.7  | 200   | 296.7 |
| $M_{4>2}$          | 0.0   | 21.3  | 51.7  | 140   | 230   |
| $M_{4>3}$          | 0.0   | 11.3  | 25.7  | 43.3  | 342   |
| $M_{4>5}$          | 177.3 | 402.7 | 447.7 | 484   | 500.7 |
| $M_{4>6}$          | 0.0   | 0.0   | 91    | 172   | 340.7 |
| $M_{4>7}$          | 0.0   | 4.7   | 13.7  | 24    | 306.7 |
| $M_{4>8}$          | 202.7 | 396.7 | 443   | 490   | 507.3 |
| $M_{4>9}$          | 0.0   | 0.0   | 0.3   | 35.3  | 362   |
| $M_{4>10}$         | 0.0   | 0.0   | 12.3  | 24.7  | 251.3 |
| $M_{5>1}$          | 17.3  | 130   | 205   | 235   | 410.7 |
| $M_{5>2}$          | 0.0   | 0.0   | 0.3   | 68.7  | 342.7 |
| $M_{5>3}$          | 38.7  | 82.7  | 140.3 | 194.7 | 439.3 |
| $M_{5>4}$          | 292   | 325.3 | 368.3 | 446.7 | 479.3 |
| $M_{5>6}$          | 0.0   | 0.0   | 0.3   | 146   | 248.7 |

| Parameter | 2.5%  | 25%   | Mode  | 75%   | 97.5% |
|-----------|-------|-------|-------|-------|-------|
| M5->7     | 178.7 | 354.7 | 393.7 | 484.7 | 504   |
| M5->8     | 60    | 126.7 | 203.7 | 282   | 486   |
| M5->9     | 85.3  | 132   | 231   | 261.3 | 460.7 |
| M5->10    | 298   | 442   | 472.3 | 482.7 | 506.7 |
| M6->1     | 200.7 | 371.3 | 475.7 | 491.3 | 498.7 |
| M6->2     | 0.0   | 0.0   | 18.3  | 62.7  | 424   |
| M6->3     | 38    | 270.7 | 298.3 | 334.7 | 363.3 |
| M6->4     | 152   | 377.3 | 421.7 | 481.3 | 497.3 |
| M6->5     | 0.0   | 0.0   | 19.7  | 120   | 271.3 |
| M6->7     | 0.0   | 0.0   | 0.3   | 50    | 299.3 |
| M6->8     | 0.0   | 0.0   | 0.3   | 91.3  | 314.7 |
| M6->9     | 20    | 183.3 | 207.7 | 300   | 482   |
| M6->10    | 80    | 156   | 219.7 | 308   | 499.3 |
| M7->1     | 259.3 | 368   | 414.3 | 451.3 | 503.3 |
| M7->2     | 264.7 | 440.7 | 477   | 490.7 | 508.7 |
| M7->3     | 3.3   | 10    | 37    | 113.3 | 173.3 |
| M7->4     | 0.0   | 8.0   | 71    | 138   | 453.3 |
| M7->5     | 0.0   | 0.0   | 0.3   | 67.3  | 421.3 |
| M7->6     | 190.7 | 386.7 | 420.3 | 490   | 498   |
| M7->8     | 7.3   | 40    | 119.7 | 184   | 348.7 |
| M7->9     | 40.7  | 178.7 | 209.7 | 288.7 | 408.7 |
| M7->10    | 9.3   | 104.7 | 186.3 | 244   | 486   |
| M8->1     | 212.7 | 358   | 440.3 | 480   | 498.7 |
| M8->2     | 177.3 | 252   | 295.7 | 340.7 | 489.3 |
| M8->3     | 0.0   | 22.7  | 36.3  | 86    | 273.3 |
| M8->4     | 78    | 173.3 | 215.7 | 282.7 | 493.3 |
| M8->5     | 180.7 | 221.3 | 385   | 431.3 | 359.3 |
| M8->6     | 0.0   | 0.0   | 0.3   | 60    | 165.3 |
| M8->7     | 0.0   | 0.0   | 0.3   | 46    | 217.3 |
| M8->9     | 249.3 | 435.3 | 475.7 | 494   | 505.3 |
| M8->10    | 0.0   | 0.0   | 0.3   | 145.3 | 334   |
| M9->1     | 186   | 356   | 400.3 | 473.3 | 501.3 |
| M9->2     | 0.0   | 0.0   | 0.3   | 42    | 228.7 |
| M9->3     | 102.7 | 256   | 307.7 | 384   | 468.7 |
| M9->4     | 0.0   | 0.0   | 19    | 76    | 498.7 |
| M9->5     | 88.7  | 190.7 | 265.7 | 314.7 | 477.3 |
| M9->6     | 140.7 | 337.3 | 393.7 | 480.7 | 495.3 |
| M9->7     | 0.0   | 0.7   | 33.7  | 144.7 | 394   |
| M9->8     | 79.3  | 328   | 413   | 480.7 | 496.7 |
| M9->10    | 108.7 | 361.3 | 399   | 462.7 | 500   |
| M10->1    | 69.3  | 176.7 | 241   | 310.7 | 494   |
| M10->2    | 0.0   | 0.0   | 0.3   | 42    | 228.7 |
| M10->3    | 199.3 | 295.3 | 341.7 | 408   | 490.7 |
| M10->4    | 293.3 | 429.3 | 476.3 | 496.7 | 510   |
| M10->5    | 138   | 264.7 | 327.7 | 412.7 | 499.3 |
| M10->6    | 0.0   | 29.3  | 43    | 79.3  | 199.3 |
| M10->7    | 270.7 | 350.7 | 397   | 484   | 487.3 |
| M10->8    | 180   | 261.3 | 323   | 347.3 | 495.3 |
| M10->9    | 53.3  | 370   | 403   | 486.7 | 496   |

1= Wat Khanontai, Ayutthaya (AY1); 2= Wat Thasung, Ayutthaya (AY2); 3= Wat Chantraram, Anghthong (AT1)  
4= Wat Tanen, Ayutthaya (AY3); 5= Wat Mongkonteeparam, Saraburi (SB1); 6= Wat Thewabut, Prachinburi (PBR1); 7= Wat Bangkrabao, Prachinburi (PBR2); 8= Education Center, Chonburi (CH1); 9= Wat Luangphrommawat, Chonburi (CH2); 10= Wat Phobangkla, Chachoengsao (CHS2)
