# Supplementary material
Source: MDPI journal article supplement (https://www.mdpi.com/2071-1050/14/17/10791)
Supplement: s1 [file s1]

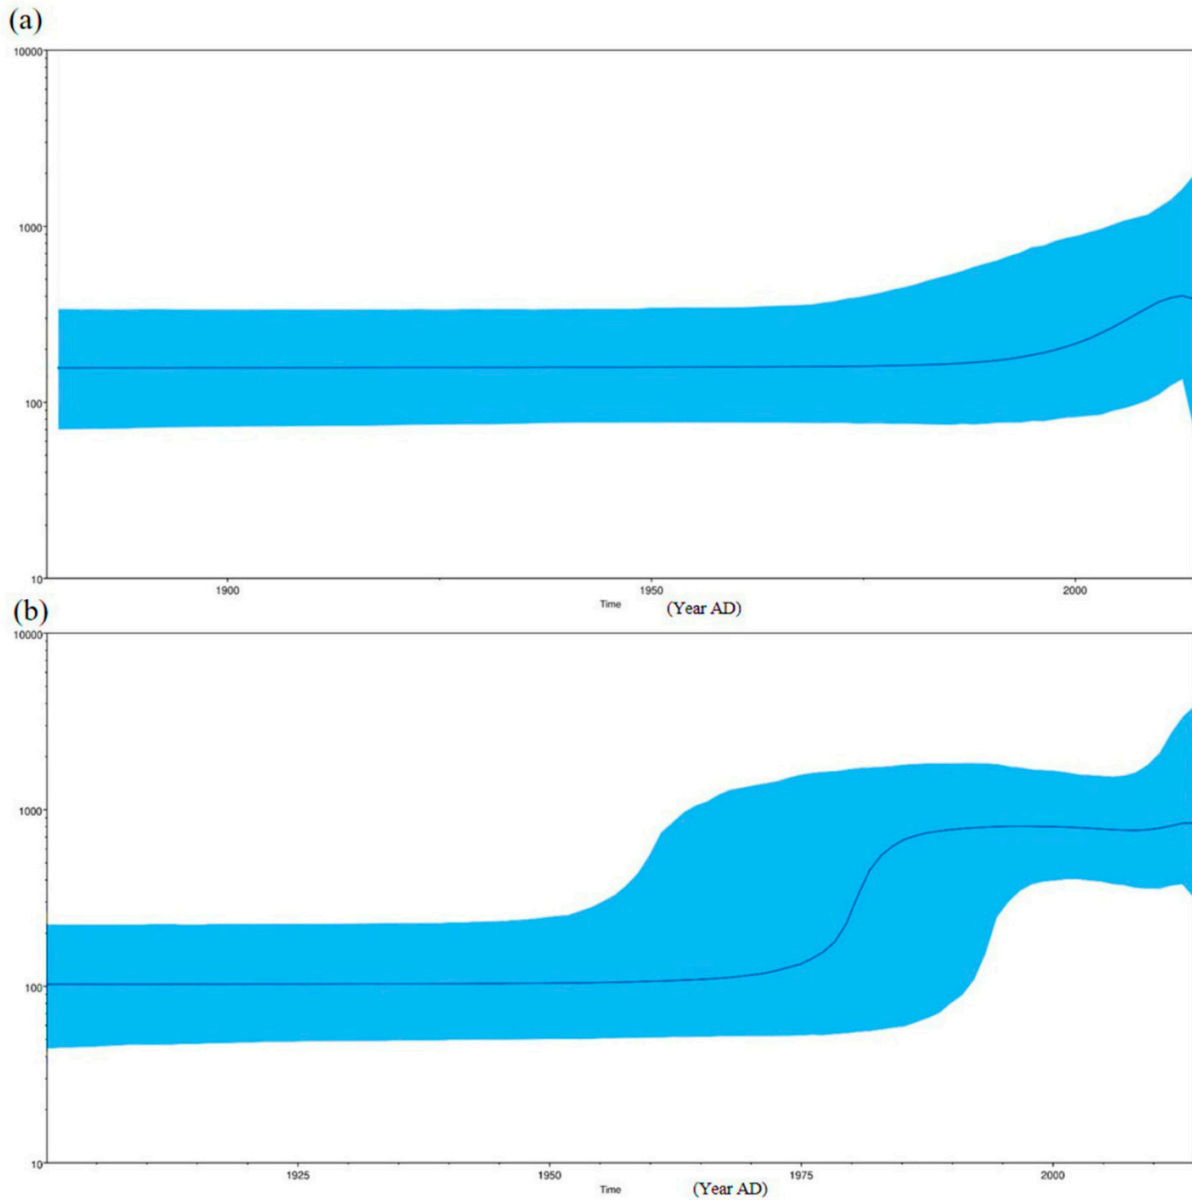

**Figure S1.** Coalescent Bayesian Skyline analysis output. (a) mt D-loop and (b) mt *Cytb* of Lyle's flying fox (*Pteropus lylei*). The black line is the median estimated effective population size. The two blue areas represent the upper and lower bounds of the 95% higher posterior density interval. The x-axis represents time in years and the y-axis represents a log-scale.
